# Coalescent theory of migration network motifs

NICOLAS ALCALA<sup>\*,1</sup>, AMY GOLDBERG<sup>\*</sup>, UMA RAMAKRISHNAN<sup>†</sup> and NOAH A. ROSENBERG<sup>\*</sup>

<sup>\*</sup>Department of Biology, Stanford University, Stanford, CA 94305-5020, USA, <sup>†</sup>National Centre for Biological Sciences, Bangalore, Karnataka 560065, India

**ABSTRACT** Natural populations display a variety of spatial arrangements, each potentially with a distinctive impact on genetic diversity and genetic differentiation among subpopulations. Although the spatial arrangement of populations can lead to intricate migration networks, theoretical developments have focused mainly on a small subset of such networks, emphasizing the island-migration and stepping-stone models. In this study, we investigate all small network motifs: the set of all possible migration networks among populations subdivided into at most four subpopulations. For each motif, we use coalescent theory to derive expectations for three quantities that describe genetic variation: nucleotide diversity,  $F_{ST}$ , and half-time to equilibrium diversity. We describe the impact of network properties on these quantities, finding that motifs with a large mean node degree have the largest nucleotide diversity and the longest time to equilibrium, whereas motifs with small density have the largest  $F_{ST}$ . In addition, we show that the motifs whose pattern of variation is most strongly influenced by loss of a connection or a subpopulation are those that can be split easily into several disconnected components. We illustrate our results using two example datasets—sky island birds of genus *Brachypteryx* and Indian tigers—identifying disturbance scenarios that produce the greatest reduction in genetic diversity; for tigers, we also compare the benefits of two assisted gene flow scenarios. Our results have consequences for understanding the effect of geography on genetic diversity and for designing strategies to alter population migration networks to maximize genetic variation in the context of conservation of endangered species.

**KEYWORDS** coalescent theory; genetic differentiation; network; population structure

1 COALESCENT theory is a powerful tool to predict patterns of  
2 genetic variation in models of population structure, and  
3 many studies have investigated the predictions of coalescent  
4 models about genetic variation under a variety of different  
5 assumptions about the genetic structure of populations (Donnelly  
6 and Tavaré 1995; Fu and Li 1999; Rosenberg and Nordborg 2002).  
7  
8 Correctly predicting the effect of connectivity patterns on the  
9 expected amount of nucleotide diversity and genetic differentia-  
10 tion is important in a range of settings. In population genetics,

11 such predictions enable descriptions of the impact of migration  
12 as one of the main evolutionary forces influencing allele frequen-  
13 cies. In molecular ecology, they help evaluate the consequences  
14 of abiotic factors such as geographic barriers, and biotic factors  
15 such as assortative mating, on levels of genetic diversity and  
16 genetic differentiation. In conservation genetics, they can be  
17 used to quantify the impact of past and future disturbance, as  
18 well as to predict the outcome of management initiatives.

19 The two most frequently examined models of population  
20 structure are the island-migration and stepping-stone models.  
21 In the island model, individuals can migrate from any subpopu-  
22 lation to any other subpopulation, all with the same rate (Wright

Copyright © 2017 by the Authors

Manuscript compiled: Monday 18<sup>th</sup> September, 2017

<sup>1</sup>Affiliation correspondence address and email for the corresponding author.

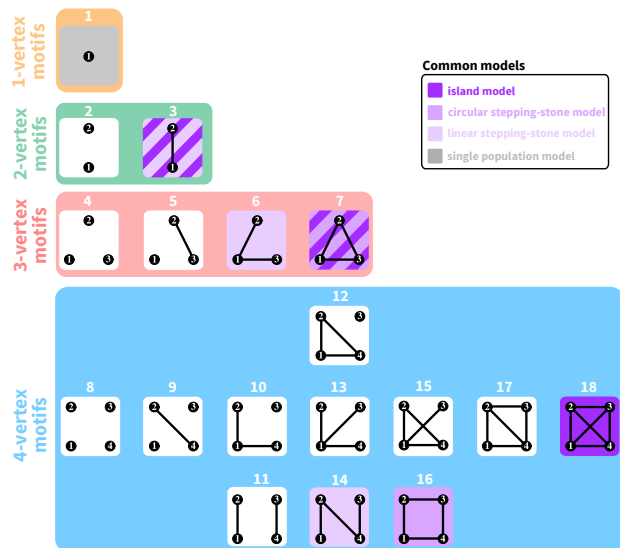

**Figure 1** All possible network motifs for sets of at most 4 vertices. Purple motif backgrounds highlight motifs that follow standard models, island or stepping-stone or both. Note that we take the term “motif” to indicate a specific small undirected graph (rather than a small directed or undirected subgraph statistically overrepresented in large empirical networks, as in many applications).

1951). In the stepping-stone model, individuals can only migrate to neighboring subpopulations (Kimura 1953; Maruyama 1970). Stepping-stone models can represent multiple spatial arrangements. Under the circular stepping-stone model, subpopulations are arranged in a circle, so that all individuals can migrate to exactly two subpopulations.

Although the island and stepping-stone models can accommodate a variety of patterns of connectivity among subpopulations, they represent only some of the possible patterns, or network “motifs.” Indeed, these models account for only 7 of 18 motifs possible for sets of one to four subpopulations (Figure 1). Numbering motifs by the classification from Read and Wilson (2005, p. 8), motif 1 corresponds to the panmictic population model, motif 18 to the island model, motifs 6, 14, and 16 to stepping-stone models, and motifs 3 and 7 to both island and stepping-stone models. Although tools of coalescent theory to study arbitrary migration models are available (Wilkinson-Herbots 1998), to our knowledge, patterns of variation expected from the remaining 11 motifs have not been described.

An objective in the study of spatial arrangements of populations is to examine the properties of networks representing

arbitrary connectivity patterns. The number of patterns grows rapidly with the number of subpopulations, however, and the comprehensive description of networks of arbitrary size is a combinatorial challenge. Because small network motifs are the “building blocks” of large networks (Milo *et al.* 2002), the derivation of their features can be a step in predicting properties of complex connectivity networks. We thus characterize coalescent quantities under all possible motifs describing the spatial arrangements of up to four subpopulations. We first derive the expected coalescence times between pairs of lineages sampled in each of the subpopulations and pairs sampled from different subpopulations. For each subpopulation, we compute three population-genetic quantities: expected nucleotide diversity, expected  $F_{ST}$  values between pairs of subpopulations, and half-time to equilibrium after a perturbation. For each motif, we compute four network statistics—number of vertices, number of edges, mean degree, and density—correlating them with the population-genetic quantities. Finally, we investigate the nucleotide diversity lost after a connectivity loss or a subpopulation loss—a transition between motifs. We interpret the results in relation to problems in conservation genetics, considering two case studies, birds of genus *Brachypteryx* and Indian tigers. For both examples, we (i) consider genetic data in a network motif framework, and (ii) evaluate the potential impacts of connectivity change on population-genetic variation.

## Model

### Population connectivity

We consider  $K$  haploid or diploid subpopulations of equal size  $N$  individuals. We denote by  $M_{ij}$  the scaled backward migration rate, representing twice the number of lineages per generation from subpopulation  $i$  that originate from subpopulation  $j$ . Thus,  $M_{ij} = 2Nm_{ij}$  for haploids and  $4Nm_{ij}$  for diploids, where  $m_{ij}$  is the probability for a lineage of subpopulation  $i$  to originate from subpopulation  $j$  in the previous generation. The total scaled migration rate of subpopulation  $i$ , or twice the scaled number of lineages that originate elsewhere, is  $M_i = \sum_{j=1, j \neq i}^K M_{ij}$ . We further assume that the numbers of migrants from each non-isolated subpopulation are all equal to  $M$ , so that for two non-isolated subpopulations  $i$  and  $j$ ,  $M_i = M_j = M$ . Time is a continuous variable  $t$ , scaled in units of the size of a single subpopulation ( $N$  for haploids,  $2N$  for diploids). We focus on

85 cases with  $1 \leq K \leq 4$ , and we consider all possible connectivity  
 86 patterns between subpopulations, where each pattern represents  
 87 a distinct graph on at most four vertices (Figure 1).

## 88 Coalescence

89 We consider the fate of two gene lineages drawn from a specific  
 90 pair of subpopulations, either the same or different subpopula-  
 91 tions. We denote the state of the two lineages by  $(ij)$ , where  $i$   
 92 and  $j$  correspond to subpopulations. As the coalescence times  
 93 between two lineages with initial states  $(ij)$  and  $(ji)$  are the same,  
 94 we consider that  $(ij)$  refers to both  $(ij)$  and  $(ji)$ , and we assume  
 95 without loss of generality that  $i \leq j$ . Consequently, the number  
 96 of states for two lineages in  $K$  subpopulations is  $\binom{K}{2} + K + 1$ : this  
 97 quantity includes  $\binom{K}{2}$  states where they are in different subpopu-  
 98 lations,  $K$  where they are in the same subpopulation, and 1 state  
 99 where they have coalesced.

100 Assuming that events cannot occur simultaneously, the coa-  
 101 lescent process can be described by a continuous-time Markov  
 102 chain (Kingman 1982; Wilkinson-Herbots 1998). The list of all  
 103 possible states of the Markov chain in the case where  $K = 3$  is  
 104 represented in Figure 2.

105 The instantaneous rate matrix  $Q = (q_{ij,k\ell})$  for the Markov  
 106 chain, where  $q_{ij,k\ell}$  is the instantaneous transition rate from state  
 107  $(ij)$  to state  $(k\ell)$ , is defined by (Wilkinson-Herbots 1998):

$$q_{ij,k\ell} = \begin{cases} -1 - M_i & \text{if } i = j, i = k, \text{ and } j = \ell \\ -\frac{M_i}{2} - \frac{M_j}{2} & \text{if } i \neq j, i = k, \text{ and } j = \ell \\ M_{ik} & \text{if } i = j, i \neq k, \text{ and } j = \ell \\ M_{i\ell} & \text{if } i = j, i = k, \text{ and } j \neq \ell \\ M_{j\ell}/2 & \text{if } i \neq j, i = k, \text{ and } j \neq \ell \\ M_{jk}/2 & \text{if } i \neq j, i \neq k, \text{ and } i = \ell \\ M_{ik}/2 & \text{if } i \neq j, i \neq k, \text{ and } j = \ell \\ M_{i\ell}/2 & \text{if } i \neq j, i \neq k, j = k, \text{ and } i \neq \ell \\ 1 & \text{if } i = j, k = 0, \text{ and } \ell = 0 \\ 0 & \text{otherwise.} \end{cases} \quad (1)$$

108 It can be seen that the list in eq. 1 covers all cases for  $(i, j, k, \ell)$  by  
 109 noting that by assumption,  $i \leq j$  and  $k \leq \ell$ .

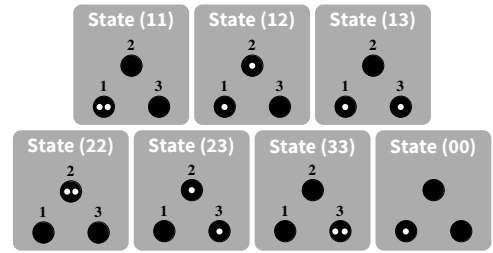

**Figure 2** Schematic representation of all states for two lineages  
 in a population divided into  $K = 3$  distinguishable subpopu-  
 lations. Lineages appear in white, and subpopulations appear  
 in black. The two lineages can either be in different subpopu-  
 lations (states (12), (13), and (23)), in the same subpopula-  
 tion ((11), (22), and (33)), or they can already have coalesced ((00)).

The transition probabilities between states after a time inter-  
 val of length  $t$  are given by

$$P(t) = e^{Qt}. \quad (2)$$

The element  $p_{ij,k\ell}(t)$  of  $P(t)$  corresponds to the transition proba-  
 bility from state  $ij$  to state  $k\ell$  in time  $t$ .

This general model embeds known models. Setting  $M_{ij} = M/(K-1)$  for all  $i$  and  $j \neq i$  leads to the finite island model (Notohara 1990; Nei and Takahata 1993). Considering subpopulations along a circle and setting  $M_{ij} = M/2$  for all adjacent subpopulations ( $i = j + 1$ ,  $i = j - 1$ , or  $\{i, j\} = \{1, K\}$ ) and  $M_{ij} = 0$  for all non-adjacent subpopulations leads to the circular stepping-stone model (Strobeck 1987). Considering subpopulations along a finite line and setting  $M_{ij} = M/2$  for  $1 < i < K$ ,  $M_{12} = M_{K,K-1} = M$ , and  $M_{ij} = 0$  for all non-adjacent subpopulations leads to the linear stepping-stone model (Wilkinson-Herbots 1998).

## Results

### Expected coalescence time

The probability that coalescence has already occurred after time  $t$  for two lineages sampled respectively in subpopulations  $i$  and  $j$  corresponds to the transition probability during time  $t$  from initial state  $(ij)$  to state (00). This probability is given by element  $p_{ij,00}$  from matrix  $P(t)$  (eq. 2). Because  $p_{ij,00}(t)$  is a cumulative probability, the associated density function is

$$f_{ij}(t) = \frac{dp_{ij,00}(t)}{dt}. \quad (3)$$

**Table 1** Exact mean coalescence times and  $F_{ST}$  values for 2-vertex motifs.  $\bar{t}_{ij}$  represents the expected coalescence time for a pair of lineages, one sampled from subpopulation  $i$  and one sampled from subpopulation  $j$  (eq. 4).  $F_{ij}$  is the value of  $F_{ST}$  between subpopulations  $i$  and  $j$  (eq. 6).

| Motif | $\bar{t}_{11}$ | $\bar{t}_{22}$ | $\bar{t}_{12}$        | $F_{12}$         |
|-------|----------------|----------------|-----------------------|------------------|
| 2     | 1              | 1              | $\infty$              | 1                |
| 3     | 2              | 2              | $2(1 + \frac{1}{2M})$ | $\frac{1}{1+4M}$ |

**Table 2** Exact mean coalescence times and  $F_{ST}$  values for 3-vertex motifs. Owing to symmetries in migration motifs (Figure 1),  $\bar{t}_{22} = \bar{t}_{33}$  and  $\bar{t}_{12} = \bar{t}_{13}$ , and thus,  $F_{12} = F_{13}$ .

| Motif | $\bar{t}_{11}$ | $\bar{t}_{22}, \bar{t}_{33}$ | $\bar{t}_{12}, \bar{t}_{13}$    | $\bar{t}_{23}$                 | $F_{12}, F_{13}$            | $F_{23}$         |
|-------|----------------|------------------------------|---------------------------------|--------------------------------|-----------------------------|------------------|
| 4     | 1              | 1                            | $\infty$                        | $\infty$                       | 1                           | 1                |
| 5     | 1              | 2                            | $\infty$                        | $2(1 + \frac{1}{2M})$          | 1                           | $\frac{1}{1+4M}$ |
| 6     | $\frac{8}{5}$  | $\frac{8}{5}$                | $\frac{8}{5}(1 + \frac{5}{8M})$ | $\frac{8}{5}(1 + \frac{1}{M})$ | $\frac{1}{1+\frac{16}{5}M}$ | $\frac{1}{1+2M}$ |
| 7     | 3              | 3                            | $3(1 + \frac{2}{3M})$           | $3(1 + \frac{2}{3M})$          | $\frac{1}{1+3M}$            | $\frac{1}{1+3M}$ |

The expected coalescence time for two lineages sampled in subpopulations  $i$  and  $j$  is thus

$$\bar{t}_{ij} = \int_0^{\infty} t f_{ij}(t) dt. \quad (4)$$

We derive in Appendix A the system of equations that can be solved to obtain the expected coalescence times in cases with one to four subpopulations. The expected coalescence times for motif 1—one isolated subpopulation—is simply 1. The expected coalescence times for the two-vertex motifs (motifs 2 and 3) appear in Table 1, for the three-vertex motifs (4 to 7) in Table 2, and for the four-vertex motifs (8 to 18) in Table 3.

The set of all pairwise coalescence times of a motif is informative about another quantity of interest: the total coalescence time, that is, the coalescence time of two lineages randomly sampled in any two  $K$  subpopulations, possibly the same one. Indeed, the total coalescence time is simply  $\bar{t}_T = (1/K^2) \sum_{i=1}^K \sum_{j=1}^K \bar{t}_{ij}$ , the mean coalescence time across all possible subpopulation pairs. The total coalescence times for all motifs presented in Figure 1 appear in Table S1.

**Table 3** Exact mean coalescence times for 4-vertex motifs. Owing to symmetries in migration motifs (Figure 1),  $\bar{t}_{22} = \bar{t}_{44}$ .

| Motif | $\bar{t}_{11}$                                  | $\bar{t}_{22}, \bar{t}_{44}$                 | $\bar{t}_{33}$                             | $\bar{t}_{12}$                                                                       | $\bar{t}_{13}$                                             | $\bar{t}_{14}$        | $\bar{t}_{23}$                                        | $\bar{t}_{24}$                                             | $\bar{t}_{34}$        |
|-------|-------------------------------------------------|----------------------------------------------|--------------------------------------------|--------------------------------------------------------------------------------------|------------------------------------------------------------|-----------------------|-------------------------------------------------------|------------------------------------------------------------|-----------------------|
| 8     | 1                                               | 1                                            | 1                                          | $\infty$                                                                             | $\infty$                                                   | $\infty$              | $\infty$                                              | $\infty$                                                   | $\infty$              |
| 9     | 1                                               | 2                                            | 1                                          | $\infty$                                                                             | $\infty$                                                   | $\infty$              | $\infty$                                              | $2(1 + \frac{1}{2M})$                                      | $\infty$              |
| 10    | $\frac{8}{5}$                                   | $\frac{8}{5}$                                | 1                                          | $\frac{8}{5}(1 + \frac{5}{8M})$                                                      | $\infty$                                                   | $\infty$              | $\frac{8}{5}(1 + \frac{5}{8M})$                       | $\frac{8}{5}(1 + \frac{1}{M})$                             | $\infty$              |
| 11    | 2                                               | 2                                            | 2                                          | $2(1 + \frac{1}{2M})$                                                                | $\infty$                                                   | $\infty$              | $\infty$                                              | $\infty$                                                   | $2(1 + \frac{1}{2M})$ |
| 12    | 3                                               | 3                                            | 1                                          | $3(1 + \frac{2}{3M})$                                                                | $\infty$                                                   | $\infty$              | $3(1 + \frac{2}{3M})$                                 | $3(1 + \frac{2}{3M})$                                      | $\infty$              |
| 13    | 3                                               | 3                                            | 3                                          | $3(1 + \frac{2}{3M})$                                                                | $3(1 + \frac{2}{3M})$                                      | $3(1 + \frac{2}{3M})$ | $3(1 + \frac{2}{3M})$                                 | $3(1 + \frac{2}{3M})$                                      | $\infty$              |
| 14    | $\frac{2(45M+44)}{25M+28}$                      | $\frac{2(45M+52)}{25M+28}$                   | $F_{11}$                                   | $\frac{3(30M^2+51M+20)}{M(25M+28)}$                                                  | $\frac{3(1+2)}{3M}$                                        | $\frac{3(1+2)}{3M}$   | $\frac{2(3M+4)(15M+16)}{M(25M+28)}$                   | $\frac{3(1+2)}{3M}$                                        | $F_{12}$              |
| 15    | $\frac{1440M^2+3639M+2240}{3(135M^2+340M+208)}$ | $\frac{3(160M^2+403M+246)}{135M^2+340M+208}$ | $\frac{480M^2+1171M+688}{135M^2+340M+208}$ | $\frac{480M^3+1529M^2-1670M-568}{M(135M^2+340M+208)}$                                | $\frac{480M^2+1516M^2+1519M+480}{M(135M^2+340M+208)}$      | $F_{12}$              | $\frac{480M^2+1738M^2+2073M+816}{M(135M^2+340M+208)}$ | $\frac{(3M+2)(160M^2+403M+246)}{M(135M^2+340M+208)}$       | $F_{23}$              |
| 16    | 4                                               | 4                                            | 4                                          | $4(1 + \frac{3}{4M})$                                                                | $4(1 + \frac{3}{4M})$                                      | $4(1 + \frac{3}{4M})$ | $4(1 + \frac{3}{4M})$                                 | $4(1 + \frac{3}{4M})$                                      | $4(1 + \frac{3}{4M})$ |
| 17    | $\frac{4(25M+20)}{26M+27}$                      | $\frac{4(25M+26)}{26M+27}$                   | $F_{11}$                                   | $4(1 + \frac{3}{4M}) \left( \frac{25M+20}{26M+27} - \frac{1330M+24}{26M+27} \right)$ | $4(1 + \frac{3}{4M}) \left( \frac{25M+20}{26M+27} \right)$ | $F_{12}$              | $4(1 + \frac{3}{4M})$                                 | $4(1 + \frac{3}{4M}) \left( \frac{25M+20}{26M+27} \right)$ | $F_{23}$              |
| 18    | 4                                               | 4                                            | 4                                          | $4(1 + \frac{3}{4M})$                                                                | $4(1 + \frac{3}{4M})$                                      | $4(1 + \frac{3}{4M})$ | $4(1 + \frac{3}{4M})$                                 | $4(1 + \frac{3}{4M})$                                      | $4(1 + \frac{3}{4M})$ |

## 150 **Expected within-subpopulation nucleotide diversity**

151 We next calculate the expected within-subpopulation nucleotide  
152 diversity, that is, the expected number of differences between  
153 two nucleotide sequences sampled from the same subpopula-  
154 tion, assuming an infinitely-many-sites model (Kimura 1969)  
155 and a scaled mutation rate  $\theta$  per site per generation. Here,  $\theta$   
156 represents twice the number of mutant lineages per generation  
157 in a subpopulation ( $2N\mu$  for haploids,  $4N\mu$  for diploids, where  
158  $\mu$  is the unscaled per-site per-generation mutation rate). We take  
159 the mean across all subpopulations of the pairwise coalescence  
160 time within subpopulations:

$$\pi_S = \theta \left( \frac{1}{K} \sum_{i=1}^K \bar{t}_{ii} \right). \quad (5)$$

161 Note that  $\pi_S$  is also informative about total nucleotide diversity  
162 when  $M$  is large, because from Tables 1-3 and S1, the total coales-  
163 cence time tends to the mean within-subpopulation coalescence  
164 time across all subpopulations as  $M \rightarrow \infty$ .

165 We analytically computed the within-subpopulation nu-  
166 cleotide diversities for each motif by substituting the expected  
167 coalescence time from Tables 1-3 into eq. 5. Nucleotide diversity  
168 appears in Figure S1 as a function of network metrics.

## 169 **Genetic differentiation**

170 For each motif, we compute expected values of  $F_{ST}$  between  
171 pairs of distinct subpopulations  $i$  and  $j$ , denoted by  $F_{ij}$ , from  
172 pairwise coalescence times. From Slatkin (1991),

$$F_{ij} = \frac{\bar{t}_T^{ij} - \bar{t}_S^{ij}}{\bar{t}_T^{ij}}, \quad (6)$$

173 where  $\bar{t}_S^{ij} = (\bar{t}_{ii} + \bar{t}_{jj})/2$  is the expected coalescence time of two  
174 lineages sampled in the same subpopulation, and  $\bar{t}_T^{ij} = (\bar{t}_{ij} +$   
175  $\bar{t}_S^{ij})/2$  is the expected coalescence time of two lineages sampled  
176 in the total population. We compute eq. 6 using eq. 4.

177 For a  $K$ -vertex motif,  $F_{ST}$  has mean

$$F = \frac{2}{K(K-1)} \sum_{i=1}^{K-1} \sum_{j=i+1}^K F_{ij} \quad (7)$$

178 across subpopulation pairs. We analytically computed the ex-  
179 pected  $F_{ST}$  from eq. 7 for each motif for sets of 3 and 4 subpop-  
180 ulations (Figure 1). The expected pairwise  $F_{ST}$  values for 2-, 3-,  
181 and 4-vertex motifs appear in Tables 1, 2, and 4, respectively.  $F_{ST}$   
182 appears in Figure S1 as a function of network metrics.

## 183 **Half-time to equilibrium diversity**

184 The dynamics of  $\pi_S$  and  $F_{ST}$  are governed by the eigenvalues  
185 of matrix  $Q$  (eq. 1; e.g., Slatkin 1991). Considering an event that  
186 changed the population demography  $\tau$  time units ago,  $\pi_S$  and  
187  $F_{ST}$  will be at equilibrium in the sense that their values are stable  
188 through time if the probability that coalescence occurs at time  
189  $t > \tau$  is small, and thus, if  $P(\tau) = e^{Q\tau} \approx [0, 0, \dots, 0, 1]^T$ , where  
190 the last entry corresponds to the coalesced state.

191 Considering the eigendecomposition  $Q = U\Lambda U^{-1}$ , where  $\Lambda$   
192 is the diagonal matrix whose elements correspond to the eigen-  
193 values of  $Q$  and  $U$  is the matrix whose columns are the eigenvec-  
194 tors of  $Q$ ,  $P(\tau) = Ue^{\Lambda\tau}U^{-1}$ . Thus,  $P(\tau) \approx [0, 0, \dots, 0, 1]^T$  when  
195  $e^{\Lambda\tau} \approx [0, 0, \dots, 0, 1]^T$ , which requires that  $e^{\lambda_i\tau} \approx 0$  for all eigen-  
196 values  $\lambda_i$  except one, for which  $e^{\lambda_i\tau} \approx 1$ . This condition holds if  
197 the largest eigenvalue of  $Q$  is 0 and the second-largest—denoted  
198 by  $\lambda$ —satisfies  $e^{\lambda\tau} \approx 0$ . Because  $Q$  is an irreducible instantane-  
199 ous rate matrix, its largest eigenvalue is 0 and all other eigen-  
200 values are strictly negative (corollary 4.9 in Asmussen 2008).

201 We define the half-time to equilibrium  $\tau$  as a function of  $\lambda$ ,  
202 the second-largest eigenvalue of matrix  $Q$ , as

$$\tau = -\ln(2)/\lambda. \quad (8)$$

203  $\tau$  corresponds to the time at which  $e^{\lambda\tau} = 1/2$ . Thus, when  
204  $t \gg \tau$ ,  $P(t) \approx [0, 0, \dots, 0, 1]^T$ , and  $\pi_S$  and  $F_{ST}$  are approximately  
205 at equilibrium. The value of  $\tau$  gives a sense of the time needed  
206 for  $\pi_S$  and  $F_{ST}$  to reach equilibrium values after a perturbation,  
207 such as after a loss of a connection or a subpopulation. This  
208 value depends on subpopulation connectivity patterns.

209 We computed the half-time to equilibrium from eq. 8 for each  
210 motif for sets of 1 to 4 subpopulations (Figure 1), numerically  
211 evaluating the second-largest eigenvalue of  $Q$ . Results appear  
212 in Figure S1 as a function of network metrics.

## 213 **Network motifs and patterns of genetic variation**

214 To describe the influence of the properties of network motifs on  
215 our genetic variation measures, we computed the correlations be-  
216 tween four network metrics and the mean within-subpopulation  
217 diversity  $\pi_S$ , the mean  $F_{ST}$  across pairs of subpopulations,  $F$ ,  
218 and the half-time to equilibrium diversity  $\tau$ .

219 **Network metrics** For a given motif, we denote by  $V$  and  $E$  its  
220 sets of vertices and edges, so that  $|V|$  and  $|E|$  correspond to the  
221 numbers of vertices and edges of the motif.



**Table 4** Exact  $F_{ST}$  values for 4-vertex motifs.

| Motif | $F_{12}$                                                | $F_{13}$                                               | $F_{14}$                    | $F_{23}$                                              | $F_{24}$                        | $F_{34}$                   |
|-------|---------------------------------------------------------|--------------------------------------------------------|-----------------------------|-------------------------------------------------------|---------------------------------|----------------------------|
| 8     | 1                                                       | 1                                                      | 1                           | 1                                                     | 1                               | 1                          |
| 9     | 1                                                       | 1                                                      | 1                           | 1                                                     | $\frac{1}{1+4M}$                | 1                          |
| 10    | $\frac{1}{1+\frac{16}{5}M}$                             | 1                                                      | $\frac{1}{1+\frac{16}{5}M}$ | 1                                                     | $\frac{1}{1+2M}$                | 1                          |
| 11    | $\frac{1}{1+4M}$                                        | 1                                                      | 1                           | 1                                                     | 1                               | $\frac{1}{1+4M}$           |
| 12    | $\frac{1}{1+3M}$                                        | 1                                                      | $\frac{1}{1+3M}$            | 1                                                     | $\frac{1}{1+3M}$                | 1                          |
| 13    | $\frac{1}{1+3M}$                                        | $\frac{1}{1+3M}$                                       | $\frac{1}{1+3M}$            | $\frac{1}{1+2M}$                                      | $\frac{1}{1+2M}$                | $\frac{1}{1+2M}$           |
| 14    | $\frac{19M+20}{60M^2+83M+20}$                           | $\frac{3(51M+52)}{180M^2+329M+156}$                    | $\frac{1}{1+\frac{3}{2}M}$  | $F_{14}$                                              | $\frac{81M+92}{180M^2+289M+92}$ | $F_{12}$                   |
| 15    | $\frac{1104M^2+2783M+1704}{2880M^3+8370M^2+7237M+1704}$ | $\frac{972M^2+2405M+1440}{2880M^3+8124M^2+6709M+1440}$ | $F_{12}$                    | $\frac{2(137M^2+340M+204)}{480M^3+1464M^2+1393M+408}$ | $\frac{1}{1+3M}$                | $F_{23}$                   |
| 16    | $\frac{1}{1+\frac{8}{3}M}$                              | $\frac{1}{1+2M}$                                       | $\frac{1}{1+\frac{8}{3}M}$  | $\frac{1}{1+\frac{8}{3}M}$                            | $\frac{1}{1+2M}$                | $\frac{1}{1+\frac{8}{3}M}$ |
| 17    | $\frac{295M+306}{800M^2+1125M+306}$                     | $\frac{1}{1+2M}$                                       | $F_{12}$                    | $F_{12}$                                              | $\frac{1}{1+\frac{8}{3}M}$      | $F_{12}$                   |
| 18    | $\frac{1}{1+\frac{8}{3}M}$                              | $\frac{1}{1+\frac{8}{3}M}$                             | $\frac{1}{1+\frac{8}{3}M}$  | $\frac{1}{1+\frac{8}{3}M}$                            | $\frac{1}{1+\frac{8}{3}M}$      | $\frac{1}{1+\frac{8}{3}M}$ |

222 The first network metric we use is  $|V|$ , the motif size, or  
 223 number of subpopulations  $K$ ; here,  $|V|$  ranges from 1 to 4. The  
 224 second metric is  $|E|$ , which corresponds to the number of pairs  
 225 of subpopulations between which gene flow occurs;  $|E|$  ranges  
 226 between 0 and  $\binom{|V|}{2} = \binom{K}{2}$ . Our third metric is the mean vertex  
 227 degree  $|E|/|V|$ , or the number of connections of an average  
 228 subpopulation; it ranges from 0 to  $K - 1$ . The fourth network  
 229 metric is the density  $|E|/\binom{|V|}{2}$ , the number of edges divided by  
 230 the maximum number of edges possible if the motif were a fully  
 231 connected graph; it ranges from 0 to 1.

232 **Correlations between network metrics and patterns of genetic**  
 233 **variation** Correlations between network metrics and  $\pi_S$ ,  $F$ , and  
 234  $\tau$  for motifs with up to four subpopulations appear in Figure 3.  
 235 Diversity  $\pi_S$  is positively correlated with all four metrics, most  
 236 strongly with the number of edges  $|E|$  ( $\rho = 0.96$  for  $M = 10$ ;  
 237 Figure 3A) and the mean degree  $|E|/|V|$  ( $\rho = 0.96$  for  $M = 0.1$   
 238 and  $M = 1$ ; Figure 3A). Indeed, the highest values of  $\pi_S$  occur  
 239 for motifs 16, 17, and 18, which have the largest mean degree  
 240 (2, 2.5, and 3, respectively), whereas the lowest values occur for  
 241 motifs 1, 2, 4, and 8, which have mean degree 0.

242  $F$  correlates negatively with the four metrics, especially the  
 243 density  $|E|/\binom{|V|}{2}$  ( $\rho = -0.92$  for  $M = 10$ ; Figure 3B). Indeed,  
 244 for large  $M$  (Figure S1H), the lowest  $F$  values occur for the  
 245 densest motifs—3, 7, and 18—which have the maximal number

of connections. The largest  $F$  values occur for the least dense  
 motifs—2, 4, and 8—which have 0 edges.

Finally,  $\tau$  is positively correlated with the four metrics, and  
 most strongly with the mean degree  $|E|/|V|$  ( $\rho = 0.95$  for  $M =$   
 10; Figure 3C). For large  $M$  (Figure S1I), the largest  $\tau$  values  
 correspond to the motifs with largest mean degree (16, 17, and  
 18), whereas the lowest  $\tau$  values occur for the motifs with the  
 lowest degree (1, 2, 4, and 8).

#### Impact of a disturbance event

In this section, we focus on the impact of a disturbance event  
 on mean genetic diversity  $\pi_S$ . Of the three quantities we  
 computed— $\pi_S$ ,  $F$ , and  $\tau$ —this quantity is perhaps the most  
 central to conservation biology.

**Enumerating outcomes of disturbance events** We enumerate  
 all possible outcomes that could follow a disturbance event  
 that removes a connection between two subpopulations or that  
 removes a subpopulation. To do so, we compute a “graph of  
 motifs,” where each vertex represents a motif, and we draw an  
 edge between two motifs if they differ by a single subpopulation  
 or a single connection. We orient edges of this graph from the  
 motif with the larger number of subpopulations or connections  
 toward the motif with the smaller number of subpopulations or  
 connections. We give each edge a weight corresponding to the

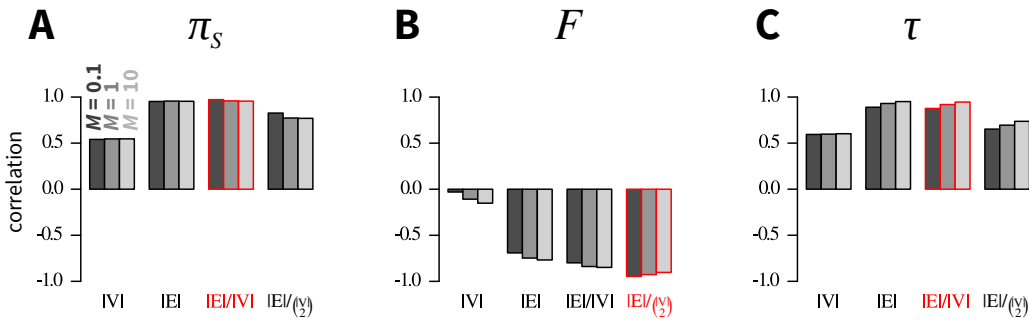

**Figure 3** Pearson correlations between network metrics and genetic diversity measures. (A)  $\pi_S$ , mean within-subpopulation nucleotide diversity (eq. 5). (B)  $F$ , mean pairwise  $F_{ST}$  across subpopulations (eq. 7). (C)  $\tau$ , half-time to equilibrium diversity (eq. 8). Network metrics include number of vertices  $|V|$ , number of edges  $|E|$ , mean number of edges per vertex  $|E|/|V|$ , and density of edges  $|E|/\binom{|V|}{2}$ . All network motifs in Figure 1 are considered. In each panel, the most strongly correlated metric appears in red.

269 proportion of within-subpopulation diversity change associated  
 270 with the transition from motif  $i$  to  $j$ ,  $w_{ij} = (\pi_S^j - \pi_S^i) / \pi_S^i$ , where  
 271  $\pi_S^i$  is the mean within-subpopulation diversity computed from  
 272 eq. 5 applied to motif  $i$ . A negative weight indicates that the  
 273 transition from motif  $i$  to motif  $j$  induces a loss of mean within-  
 274 subpopulation diversity, whereas a positive weight indicates  
 275 that the transition from motif  $i$  to motif  $j$  induces a gain of mean  
 276 within-subpopulation diversity. In the case of a vertex loss, we  
 277 consider that the lost subpopulation has diversity 0; for example,  
 278 the transition from motif 3, where two subpopulations each have  
 279 diversity 2 (Table 1), to motif 1, where a single subpopulation  
 280 has diversity 1 and the “other” has diversity 0, leads to a change  
 281 of  $w_{20} = [(1 + 0)/2 - (2 + 2)/2] / [(2 + 2)/2] = -0.75$ , that is,  
 282 of 75% of the within-subpopulation diversity.

283 **Edge losses and vertex losses** The graph of motifs appears in  
 284 Figure 4A for edge loss and in Figure 4D for vertex loss. We  
 285 focus on the case of  $M = 1$ .

286 Loss of an edge can lead to diversity changes ranging from  
 287 a loss of 50% to a gain of 4% (Figure 4B). Interestingly, the tran-  
 288 sitions that lead to the greatest losses all split a motif into dis-  
 289 connected sets of subpopulations (transitions in red, Figure 4B).  
 290 The greatest diversity loss occurs with the transition from motif  
 291 3—which has a single connected pair of subpopulations—to  
 292 motif 2—which has two isolated subpopulations. Surprisingly,  
 293 one edge-loss transition increases the diversity for all migration  
 294 rates in  $(0, \infty)$ : the transition from motif 17 to motif 16. This tran-  
 295 sition increases the coalescence time for lineages sampled from  
 296 different subpopulations without isolating any subpopulations.

297 The impact on diversity of the loss of a vertex ranges from

a loss of 75% to a loss of 10% (Figure 4E). Similarly to the edge  
 298 loss case, the vertex losses that lead to the greatest losses gener-  
 299 ally correspond to a split of the motif into disconnected sets of  
 300 subpopulations (transitions in red, Figure 4E). For instance, the  
 301 greatest diversity loss is associated with the transition from motif  
 302 13—which has a single set of four connected subpopulations—to  
 303 motif 4—which has three isolated subpopulations.  
 304

305 **Fragile and robust motifs** We can also identify the most “fragile”  
 306 motifs: the motifs for which disturbance leads to the greatest  
 307 diversity loss. For each motif, we compute the diversity changes  
 308 associated with all  $|E|$  edge or  $|V|$  vertex losses, reporting the  
 309 mean across the edge or vertex set. Motifs ranked by robustness  
 310 to an edge loss appear in Figure 4C. The most fragile motifs  
 311 are those split into disconnected components by an edge loss,  
 312 whereas the most “robust” motifs are those that are not split.

313 Motifs ranked by robustness to a vertex loss appear in Fig-  
 314 ure 4F. We can see that the most fragile motifs are motifs 3, 6, and  
 315 14 (linear stepping-stone models) and motifs 7 and 16 (circular  
 316 stepping-stone models). The linear stepping-stone motifs are  
 317 easily split by a vertex loss, producing a disconnection that is  
 318 expected to reduce diversity. The circular stepping-stone mod-  
 319 els, however, are not easily split by a vertex loss. Their fragility  
 320 stems from their high diversity, among the highest of all mod-  
 321 els, on par with island models (Tables 1, 2, and 3). Any motif  
 322 transition is thus likely to substantially reduce diversity.

## 323 Examples

324 We use the results from our network-based model to reinterpret  
 325 spatial genetic structure in two animal examples. Using

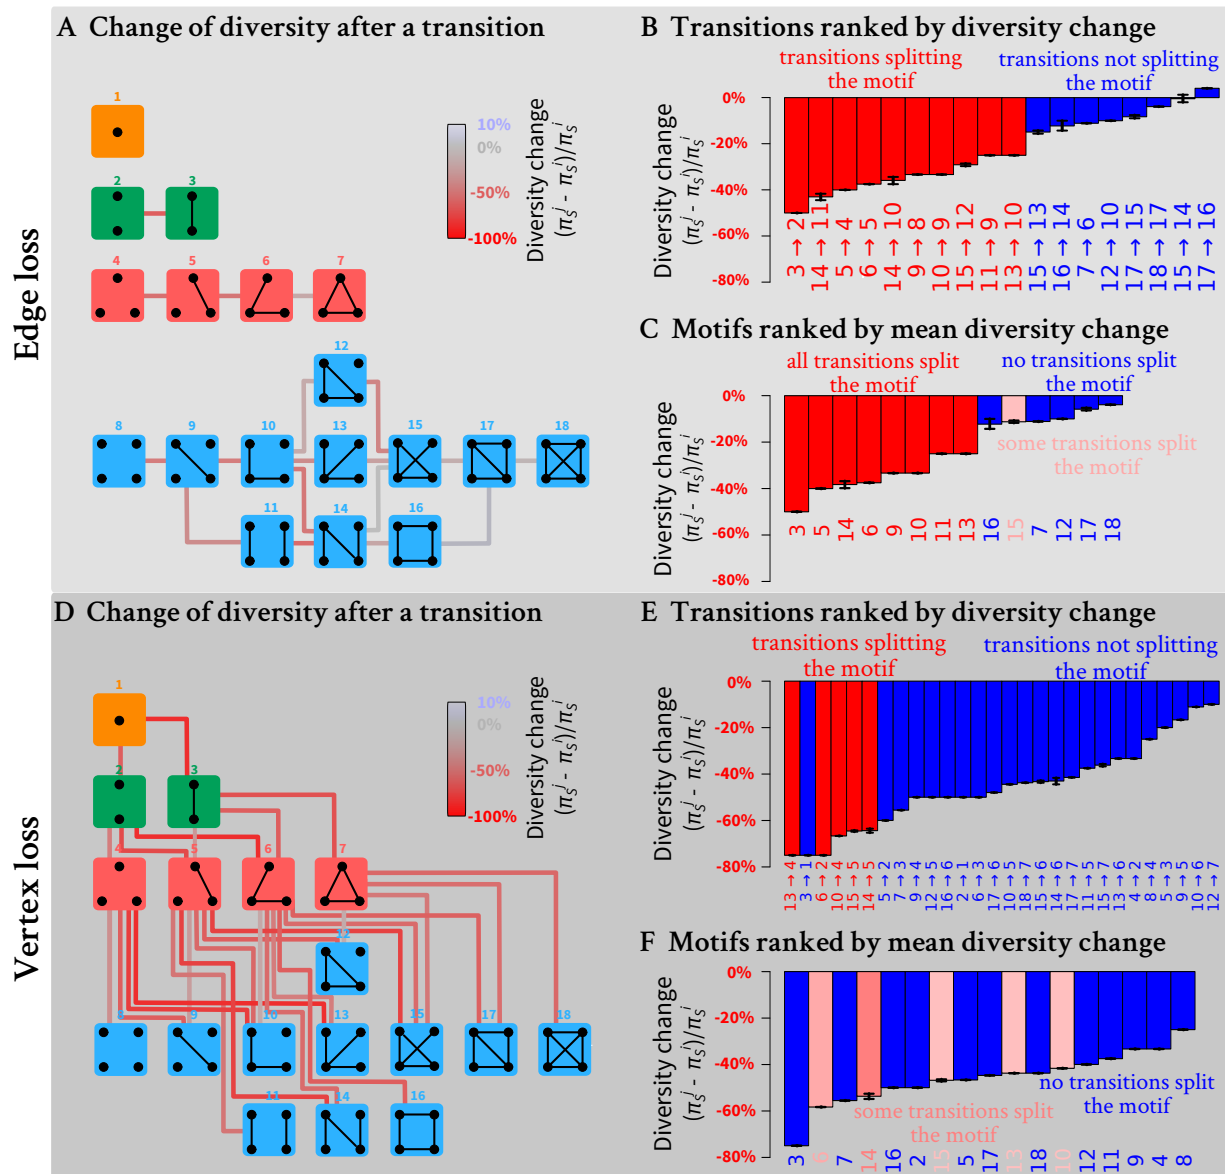

**Figure 4** Change of within-subpopulation nucleotide diversity  $(\pi_S^j - \pi_S^i)/\pi_S^i$  following a transition from motif  $i$  to motif  $j$ , for all possible transitions involving the loss of a single edge or a single vertex. (A) Schematic representation of all possible motif transitions involving an edge loss. Lines connecting motifs represent edge losses and are colored by changes of within-subpopulation nucleotide diversity: red for loss and blue for gain (see legend). (B) Motif transitions involving an edge loss ranked from the largest loss to the largest gain of within-subpopulation diversity. (C) Motifs ranked from largest to smallest mean diversity loss following edge loss. For each motif, the mean loss or gain is computed across all possible transitions to another motif. For example, for motif 5, three subpopulations can be lost; loss of the isolated subpopulation produces motif 3, generating a diversity loss of 20%, and loss of one of the two other subpopulations produces motif 2 and a diversity loss of 60%. Therefore, the mean diversity loss for motif 5 is  $(20\% + 60\% + 60\%)/3 \approx 46.7\%$ . (D) Schematic representation of all possible motif transitions involving a vertex loss. Lines connecting motifs represent vertex losses and are colored by changes of within-subpopulation nucleotide diversity. (E) Motif transitions involving a vertex loss ranked from the largest to the smallest diversity within-subpopulation diversity loss. (F) Motifs ranked from largest to smallest mean diversity loss following vertex loss. In all panels,  $(\pi_S^j - \pi_S^i)/\pi_S^i$  values assume  $M = 1$ ; in (B), (C), (E), and (F), black horizontal bars represent minimum and maximum values of  $(\pi_S^j - \pi_S^i)/\pi_S^i$  for  $M$  in  $(0, \infty)$ . Values of  $\pi_S^i$  and  $\pi_S^j$  are computed from eq. 5 using coalescence times  $\bar{t}_{ii}$  from Tables 1-3; minima and maxima of  $(\pi_S^j - \pi_S^i)/\pi_S^i$  are obtained numerically. Pink shaded bars in (B), (C), (E), and (F) indicate that a fraction of edge losses or vertex losses split a motif: 1/4 for edge loss from motif 15 or vertex loss from motif 10, 13, or 15, 1/3 for vertex loss from motif 6, and 1/2 for vertex loss from motif 8 (Alcala et al. 14).



published spatial and genetic information for each example, we propose a network motif that might represent the structure of the population. We then ask what types of transitions could result in increased or decreased population structure and variation in the context of the conservation biology of the species examined.

### Indian sky island birds of genus *Brachypteryx*

First, we consider two species of genus *Brachypteryx*, birds endemic to the Western Ghats sky islands of India: the white-bellied and the rufous-bellied shortwings *Brachypteryx albiventris* and *B. major*. Robin *et al.* (2015) reported microsatellite data from multiple geographically separated subpopulations, sampling 218 individuals at 14 microsatellite loci. These subpopulations have experienced changes in geographic range and gene flow on both evolutionary and anthropogenic time scales owing to Pleistocene climate change that could have shifted the locations of suitable habitat and recent deforestation. Such changes can influence numbers of populations and gene flow between them, and can be interpreted using our network model.

Robin *et al.* (2015) stated that genetic differentiation in the pair of species was not quite consistent with a simple island-migration model, so that our network approach might provide additional insight. Indeed, consistent with geographic barriers, Robin *et al.* (2015) observed genetic differentiation between the two species, as well as two subgroups within each species. The data generally fit motif 11 (Figure 5A), containing two relatively isolated sets of subpopulations, each with two subpopulations that exchange migrants. However,  $F_{ST}$  values between the two species sets (Table S3 of Robin *et al.* 2015) were lower than the high values expected under motif 11 (Table 4), potentially as a result of a short time scale of fragmentation.

Under the network model, supposing that the current motif is 11, we can investigate the future impact of the loss of an edge or vertex, representing events possible for an endangered species (Figure 5B). The transition from motif 11 to motif 9 is seen as a loss of an edge, corresponding to a loss of migration between one of the pairs of subpopulations. This event decreases within-subpopulation nucleotide diversity (-25%; Figure 4C), and leads to increasing  $F_{ST}$  genetic differentiation between subpopulations, particularly within each species. The loss of a subpopulation, transitioning from motif 11 to motif 5, similarly leads to a loss of within-subpopulation nucleotide diversity (-38%; Figure 4F).

Note that the losses reported are expected losses in the long term. The half-time to equilibrium  $\tau$  values for motifs 5 and 9 appear in Figure S1C, F, I. Interestingly, they are equal, and correspond to 7.69 for  $M = 0.1$ , 1.81 for  $M = 1$ , and 1.42 for  $M = 10$ , in units of  $2N$  generations. Thus, depending on the migration rate, the future decrease of genetic diversity substantially changes. The identical  $\tau$  values for the two motifs result from the fact that  $\tau$  is determined by the motif component with the lowest half time to equilibrium, and the two motifs have similar components—a pair of connected subpopulations and either one or two isolated subpopulations.

Comparing the edge loss and vertex loss scenarios, a vertex loss transition from motif 11 to motif 5 has a greater negative effect on nucleotide diversity, because it has the largest long-term effects and the equilibrium is reached as quickly as in the edge loss transition. In this case, focusing on preserving subpopulations rather than gene flow is predicted to avoid the most detrimental loss of genetic diversity for the subpopulations.

### Indian tigers

Next, we consider genetic variation for tigers in India, representing 60% of the global wild tiger population (Mondol *et al.* 2009). Natesh *et al.* (in press) considered the genetic diversity and structure across the Indian subcontinent of tigers, a species that now occupies 7% of its historical range. India's ~2,500 tigers are distributed across many small groups, with a median size of 19 across recognized groups. Understanding population structure and connectivity is important to tiger conservation.

Using 10,184 SNPs, Natesh *et al.* (in press) identified a northwestern subpopulation (dark blue cluster I in Figure 6A), a north/northeastern subpopulation (green cluster II), a central subpopulation (orange cluster III), and a southern subpopulation (purple cluster IV). They reported evidence of gene flow between subpopulations III and IV and between subpopulations II and III. The exact relationship between subpopulations, however was unclear. From the pairwise  $F_{ST}$  values reported in Table 2 of Natesh *et al.* (in press), levels of divergence between subpopulation I and all other subpopulations were high, suggesting isolation with limited gene flow. fastSTRUCTURE analyses performed by Natesh *et al.* (in press) suggested connectivity between subpopulations II and III (Figure 6A). Owing to the large  $F_{ST}$  between the northeastern subpopulation (II)

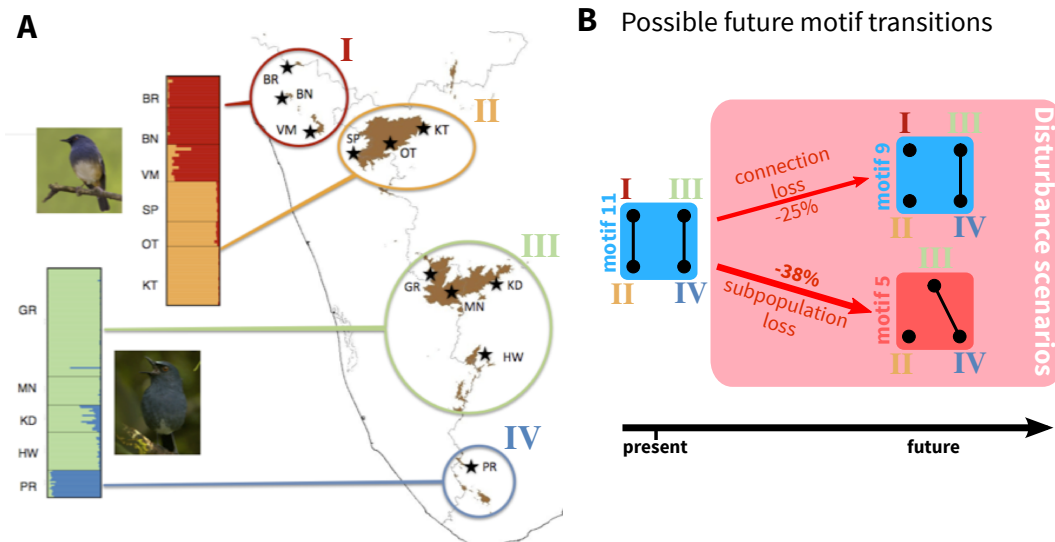

**Figure 5** Application of the network theory framework to the Indian sky island birds *Brachypteryx albigiventris* and *B. major*. (A) Map of the distribution of *B. albigiventris* and *B. major* in the Indian sky islands of the Western Ghats with sampling locations, and STRUC-TURE plot. The map and the STRUCTURE plot are adapted from Robin *et al.* (2015). Colors and roman numerals represent the four genetic clusters. Two-letter codes indicate the sampling locations. Sampling locations for *B. major* include BR: Brahmagiri; BN: Banasura; VM: Vellarimala; SP: Sispara; OT: Ooty; KT: Kothagiri. Sampling locations for *B. albigiventris* include GR: Grasshills; MN: Munnar; KD: Kodaik-anal; HW: High Wavys; and PR: Peppara. (B) Possible future motif transitions, based on the transitions from motif 11, which is taken to represent the current state of the population. Numbers on arrows represent predicted losses of mean nucleotide diversity across subpopulations (Figure 4).

408 and the southern subpopulation (IV) and between the central  
 409 subpopulation (III) and the southern subpopulation (IV), we  
 410 suggest that the motif most clearly fitting the current population  
 411 structure is motif 9.

412 Because of the smaller pairwise  $F_{ST}$  values between subpopu-  
 413 lations II and IV and between subpopulations III and IV than be-  
 414 tween subpopulations I and IV, we suggest that a recent change  
 415 in network structure occurred from motif 12 to motif 9 (Fig-  
 416 ure 6B), involving recent loss of connectivity between subpop-  
 417 ulation IV and the other subpopulations, and leading to a loss  
 418 of 40% of the within-subpopulation diversity (-10% from the  
 419 transition from motif 12 to motif 10, and then -33% from the  
 420 transition from motif 10 to motif 9). That connectivity loss might  
 421 have occurred recently is supported by previous genetic and  
 422 historical data: an earlier study with 10 microsatellite markers  
 423 suggests an older transition between motif 15 and 12, with con-  
 424 nectivity loss between subpopulations I and II (Mondol *et al.*  
 425 2013).

426 Ongoing perturbations to the network are likely, owing to  
 427 increasing human pressures and land-use changes that reduce

428 population sizes and increase fragmentation (Figure 6C). The  
 429 transition from motif 9 to motif 8, involving the loss of an edge,  
 430 would decrease within-subpopulation nucleotide diversity by  
 431 33% (Figures 4C and 6C). The loss of a subpopulation, however,  
 432 leads to qualitative differences in the genetic structure depend-  
 433 ing on the subpopulation lost. If the more isolated northwestern  
 434 subpopulation I or the southern subpopulation IV is lost, then  
 435 the resulting network is similar to motif 5, with a moderate de-  
 436 crease in within-subpopulation nucleotide diversity (-17%) and  
 437 a decrease in differentiation overall because an isolated subpopu-  
 438 lation is lost (Figures 4D and 6C). By contrast, if one of the  
 439 connected subpopulations, the central subpopulation III or the  
 440 northern/northeastern subpopulation II, is lost, then a decrease  
 441 in diversity is expected (-50%; Figures 4F and 6C).

442 To maintain or restore some of the recently lost genetic di-  
 443 versity of Indian tigers, Kelly and Phillips (2016) suggested re-  
 444 connecting isolated subpopulations by assisted migration (Fig-  
 445 ure 6C). Two such reconnection scenarios can be imagined. The  
 446 first scenario, which corresponds to restoring lost migration  
 447 routes (Figure 4B), reconnects the central subpopulation III with

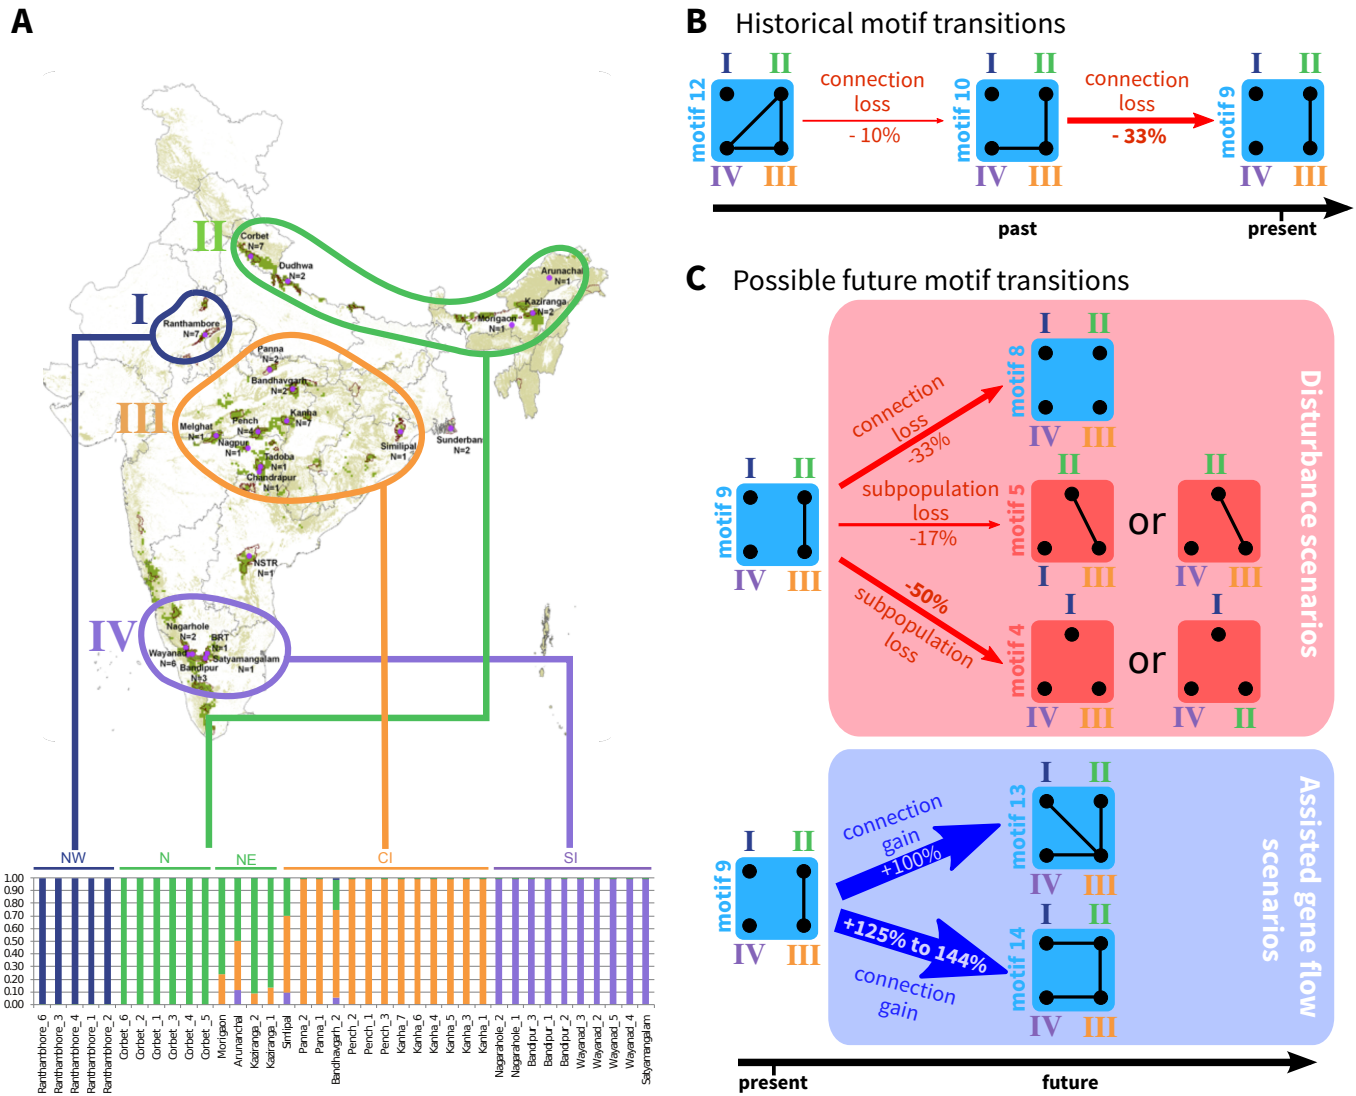

**Figure 6** Application of the network theory framework to Indian tigers. (A) Map of the distribution of tigers with sampling locations, and fastSTRUCTURE plot. The figure is adapted from [Natesh \*et al.\* \(in press\)](#). Note that sample sizes for the fastSTRUCTURE plot include only subsets of individuals from [Natesh \*et al.\* \(in press\)](#). (B) Hypothetical sequence of past motif transitions based on [Natesh \*et al.\* \(in press\)](#) and Figure 4. (C) Possible future motif transitions, based on the transitions from motif 9 (Figure 4). For (B) and (C), motif 9 is taken to represent the current state of the population; percentages correspond to the proportion of within-subpopulation diversity change following each motif transition (from Figure 4).

448 all other subpopulations, producing a transition from motif 9 to  
449 motif 13. It would lead to an increase of within-subpopulation  
450 diversity of 100%. Alternatively, a second scenario in which  
451 subpopulations are reconnected along a line, forming a linear  
452 stepping-stone, is possible, corresponding to a transition from  
453 motif 9 to motif 14. This scenario might seem less intuitive, as  
454 it does not correspond to any previous population structure.  
455 Interestingly, it leads to a greater increase of diversity (+125% to  
456 +144%, depending on the amount of gene flow; Table S2).

457 Note that the losses and gains of diversity reported are ex-  
458 pected losses and gains in the long term. The  $\tau$  values for motifs  
459 4, 5, 8, 13, and 14—the motifs that are possible as the result of  
460 the transitions in Figure 6C—appear in Figures S1C, S1F, and  
461 S1I.  $\tau$  has the same value of 0.69 for both motifs 4 and 8, because  
462 they have only isolated subpopulations.  $\tau$  for motif 5 is 7.69 for  
463  $M = 0.1$ , 1.81 for  $M = 1$ , and 1.42 for  $M = 10$ , in units of  $2N$   
464 generations. Thus, in addition to being the transition leading to  
465 the greatest diversity loss, the transition from motif 9 to motif  
466 4 is also the one that affects diversity the fastest.  $\tau$  for motif  
467 13 is 17.76 for  $M = 0.1$ , 3.34 for  $M = 1$ , and 2.19 for  $M = 10$ ,  
468 in units of  $2N$  generations.  $\tau$  for motif 14 is 29.32 for  $M = 0.1$ ,  
469 4.72 for  $M = 1$ , and 2.68 for  $M = 10$ , in units of  $2N$  generations;  
470 the time required to restore diversity exceeds the time it takes  
471 to lose it. Among assisted gene flow scenarios, the transition  
472 to motif 14 that leads to the larger amount of diversity in the  
473 long term among the pair of scenarios considered is the one with  
474 the slower change of diversity. This result suggests a trade-off  
475 between the magnitude and speed of the transition to long-term  
476 effects on diversity.

## 477 Discussion

478 We have presented a novel framework that combines network  
479 theory and population genetics to study the impact of popu-  
480 lation structure on patterns of genetic variation under diverse  
481 assumptions about population connectivity. Treating a struc-  
482 tured population as a network containing vertices that represent  
483 subpopulations and edges that represent gene flow, consider-  
484 ing all possible population network motifs for sets of one to  
485 four subpopulations, we have determined motif features that  
486 correlate with patterns of genetic variation. Among four mo-  
487 tif statistics, we found that the mean node degree is the most  
488 strongly correlated with within-subpopulation diversity, and

that motif density is the most strongly correlated with genetic  
differentiation between subpopulations.

Our framework makes it possible to predict the impact on  
genetic diversity of disturbances such as loss of a subpopulation  
or a connection between subpopulations. The effect of the loss of  
a vertex or edge depends on the context of the disturbance in the  
population network. Whereas some disturbances that split the  
network, including edge losses in transitions from motif 3 to 2  
and from 14 to 11 and the vertex loss in the transition from motif  
13 to 4, substantially reduce genetic diversity, others such as the  
transition from motif 17 to 16 instead increase mean diversity  
across subpopulations (Figure 4).

**Theoretical advances** Our results extend classical coalescent  
theory results concerning migration models. Among the 18  
network motifs we studied, 11 correspond to migration models  
that differ from the standard models.

As has been seen previously (Slatkin 1987; Strobeck 1987;  
Wilkinson-Herbots 2003), for motifs all of whose subpopula-  
tions are exchangeable and none of whose subpopulations are  
isolated, we find that the within-subpopulation pairwise coa-  
lescence times are independent of the migration rate (Table S2).  
Interestingly, we found that this result on migration rate inde-  
pendence also holds for motifs with disconnected components  
(motifs 2, 4, 5, 8-12), even though disconnection leads to viola-  
tion of the assumption of migration matrix irreducibility used  
in Slatkin (1987). This result can be explained by the fact that  
such motifs all involve juxtaposition of smaller motifs, each of  
which has exchangeable subpopulations, none of which are iso-  
lated. Consequently, even though motifs 2, 4, 5, and 8-12 do not  
satisfy the assumptions used in Slatkin (1987), that each compo-  
nent of the motif satisfies them suffices to ensure the result on  
migration-rate independence.

Motifs 14, 15, and 17, for example, do not have exchangeable  
vertices, nor can these motifs be decomposed into disconnected  
components that each have exchangeable vertices. Their within-  
subpopulation coalescence times do depend on the migration  
rate (Table S2). Nevertheless, within-subpopulation coalescence  
times of all motifs vary relatively little with the migration rate:  
the difference between the maximum and minimum values is  
less than 15% of the minimum (Table S2). We find that migration  
rates have only a small effect on within-subpopulation diversity



530 in many spatial configurations.

531 Our results also extend classical theoretical results about ge- 572  
532 netic differentiation. Under the island model,  $F_{ST}$  follows 573  
533 formula  $1/(1 + \alpha M)$ , where the constant  $\alpha > 0$  determines the 574  
534 relative impact of drift and migration (Wright 1951; Nei and 575  
535 Takahata 1993), and it approximately follows  $1/(1 + \alpha M)$  under 576  
536 the stepping-stone model (Cox and Durrett 2002). For a fixed 577  
537 number of subpopulations  $K$ , among networks with all nodes 578  
538 connected,  $\alpha$  is smallest under the island model and largest 579  
539 under the stepping-stone model (Cox and Durrett 2002).

540 We exhibit additional models under which pairwise  $F_{ST}$  fol- 581  
541 lows  $1/(1 + \alpha M)$ , where  $\alpha$  is intermediate between that expected 582  
542 under the island and stepping-stone models (Table S3). All mod- 583  
543 els with exchangeable vertices or decomposable into compo- 584  
544 nents each with exchangeable vertices (motifs 2-5, 7-9, 11, 12, 585  
545 16, 18) have  $F_{ST}$  values that follow this formula. Interestingly, 586  
546 motif 13, which does not have exchangeable vertices and is not 587  
547 decomposable in this manner, also has an  $F_{ST}$  that follows such a 588  
548 formula, with  $\alpha = 2$  or 3. Its  $\alpha$  values lie near those of the island- 589  
549 migration motif 18, with  $\alpha = 8/3$ , and the linear stepping-stone 590  
550 motif 14, with  $\alpha$  ranging from 1.129 to 3.2 across population 591  
551 pairs and across migration rates, and are also similar to that of 592  
552 the circular stepping-stone motif 16 ( $\alpha = 2$  or  $8/3$ ), although 593  
553 motif 16 has more connections.

554 Motifs 15 and 17 also have non-exchangeable vertices and are 594  
555 not decomposable, and they have  $F_{ST}$  values whose expressions 595  
556 involve rational functions of  $M$  (Table 4). We show in Table S3, 596  
557 however, that their  $F_{ST}$  values approximately follow an expres- 597  
558 sion of the form  $1/(1 + \alpha M)$ , with  $\alpha$  ranging from 1.747 to 2.989; 598  
559 in addition, their  $\alpha$  values are close to that of motif 16, with 599  
560  $\alpha = 2$  or  $8/3$ . Although motifs 4, 5, and 8-12 have at least two 600  
561 disconnected components and thus their global  $F_{ST}$  is equal to 1 601  
562 irrespective of the value of  $M$ , their pairwise  $F_{ST}$  values for con- 602  
563 nected subpopulations do follow  $1/(1 + \alpha M)$ , with  $\alpha$  ranging 603  
564 from 2 to 4. Overall, our results highlight that the classical for- 604  
565 mula  $F = 1/(1 + \alpha M)$  is a helpful approximation for all motifs 605  
566 with up to four subpopulations. 606

567 **Data applications** Our results provide a framework for inter- 607  
568 preting empirical patterns of genetic diversity and differentia- 608  
569 tion, and for predicting future patterns. We have illustrated how 609  
570 they provide insight into two systems of conservation interest, 610

Indian sky island birds of genus *Brachypteryx* and Indian tigers. 571  
After suggesting the most appropriate motif for each species and 572  
the sequence of transitions that might have led to the current 573  
motif, we enumerated future disturbances and highlighted the 574  
ones that would have the strongest long-term impact on genetic 575  
diversity within subpopulations. For tigers, we enumerated 576  
possible assisted gene flow scenarios and highlighted scenarios 577  
leading to the greatest long-term genetic diversity increase. 578

Many studies have focused on deducing population networks 579  
from genetic data in population genetics; most such applications 580  
have focused on clustering using community detection algo- 581  
rithms, without using a population-genetic model (Dyer and Na- 582  
son 2004; Dyer 2015; Garroway *et al.* 2008; Rozenfeld *et al.* 2008; 583  
Ball *et al.* 2010; Munwes *et al.* 2010; Greenbaum *et al.* 2016). While 584  
these statistical approaches are appealing for making sense of 585  
complex datasets, the mechanistic models we consider are useful 586  
for providing predictions about genetic diversity patterns. We 587  
have demonstrated how simple network motifs can be deduced 588  
from cluster analyses and pairwise  $F_{ST}$  values and can then be 589  
used to predict the impact of future disturbances. 590

The network theory framework is promising for the analysis 591  
of natural populations whose spatial arrangements do not follow 592  
classical migration models. For example, river systems involve 593  
subpopulations arranged along a stream, leading to a motif 594  
with a linear arrangement such as 3, 6, and 14, or in different 595  
streams, leading to a star-shaped motif such as 13 (Morrissey and 596  
de Kerckhove 2009). Geographic barriers owing to mountains, 597  
valleys, and human occupation can isolate one (motifs 2, 5, 11 598  
and 12) or several subpopulations (motifs 4, 8, and 9). Moreover, 599  
many landscapes present a specific zone with high resistance, 600  
for example owing to low habitat quality, leading to partial 601  
isolation of a subpopulation from a strongly connected set of 602  
subpopulations (motif 15). 603

Our exhaustive enumeration of motifs ensures that we can 604  
confront empirical data with expected patterns of genetic vari- 605  
ation under any spatial arrangement. This enumeration can 606  
improve our ability to interpret genetic data, especially for threat- 607  
ened species, which typically present high fragmentation and 608  
are likely to undergo future disturbances resulting from further 609  
human-induced habitat loss or from conservation efforts such 610  
as assisted gene flow. The framework is also promising for con- 611  
servation planning, because it suggests which connections or 612



613 subpopulations are more important in contributing to genetic  
614 variation. Historical human impacts, ongoing urbanization, and  
615 habitat fragmentation are leading to species range collapse and  
616 population decline (e.g. carnivores; [Ripple et al. 2014](#)). Some  
617 species, such as the sky island birds of genus *Brachypteryx*, are  
618 specialized to habitats that are naturally patchy and isolated  
619 ([Robin et al. 2015](#)). Understanding the consequences of such  
620 patchiness from a network perspective can provide insights on  
621 mitigation for ongoing habitat fragmentation.

622 In species such as the Indian tiger, conservation might require  
623 management strategies that include assisted migration ([Kelly  
624 and Phillips 2016](#)). In such contexts, strategies can be designed  
625 for maximizing genetic variation, by giving the existing set of  
626 subpopulations the most favorable connections possible. For  
627 designing such strategies, our approach provides an alternative  
628 to spatially explicit landscape-genetic models focused on effects  
629 in physical space, enabling assessment of the potential genetic  
630 consequences of alternative network motifs.

631 **Extensions** Several assumptions of our model could be relaxed  
632 to make it more closely match natural systems. We only con-  
633 sidered homogeneous subpopulations, with equal sizes and  
634 similar migration rates in all non-isolated subpopulations, and  
635 equilibrium genetic variation. Heterogeneous sizes are com-  
636 mon in environments with varying habitat quality ([Dias 1996](#)),  
637 and migration rate differences are common in species that dis-  
638 perse passively, such as by currents or wind ([Vuilleumier and  
639 Possingham 2006](#)). Permitting heterogeneity would increase the  
640 number of motifs possible for fixed numbers of subpopulations,  
641 potentially introducing source-sink dynamics ([Dias 1996](#)). These  
642 dynamics are expected to influence robustness to loss of a con-  
643 nection or subpopulation: we expect nucleotide diversity to be  
644 robust to loss of a connection to a sink subpopulation or loss of  
645 a sink subpopulation itself, because such subpopulations might  
646 be small with relatively low nucleotide diversity. Conversely,  
647 we expect nucleotide diversity to be less robust to the loss of  
648 a source subpopulation, as these subpopulations are typically  
649 larger and more diverse.

650 Non-equilibrium genetic diversity is common in species that  
651 face frequent environmental changes, and it can result in tran-  
652 sient levels of genetic variation that strongly differ from the  
653 equilibrium and that persist for many generations ([Alcala et al.](#)

2013; [Alcala and Vuilleumier 2014](#)). The expected diversities  
in Tables 1-4 correspond to long-term expectations, and give a  
sense of the *potential* of a given spatial configuration to permit  
large levels of genetic diversity. To assess the impact of a pertur-  
bation, long-term expectations must be contrasted with the time  
to reach them. We thus advocate computation of the half-time  
to equilibrium  $\tau$ , which gives a sense of the time needed for nu-  
cleotide diversity and  $F_{ST}$  to approach their equilibrium values.  
Interestingly, we find that  $\tau$  is strongly correlated with the mean  
vertex degree; it would be worthwhile to assess the potential of  
 $|V|$  as a predictor of  $\tau$  in larger networks.

**Conclusion** This work is a step toward developing a general  
theory that links network topology and patterns of genetic vari-  
ation. Small motifs are the building blocks of complex networks  
([Milo et al. 2002](#)); thus, for large networks, counting the number  
of appearances of each 3- or 4-vertex motif can give an initial  
idea of the fine-scale structure of the population. The results we  
have derived make it possible to link this fine-scale structure  
to local patterns of variation. For example, if we find many in-  
stances of motifs 17 or 18, we might conclude that the network is  
dense and thus has large diversity, low  $F_{ST}$ , long time to equilib-  
rium after a perturbation and a high robustness to perturbation.  
On the other hand, if we find many instances of lower-density  
motifs 9, 10, and 14, we might reach the opposite conclusions.

The detection of motifs that are overrepresented in certain  
types of network (e.g. ecological, neural, protein-interaction) has  
been used to identify network classes that share common prop-  
erties despite describing different data types ([Milo et al. 2002](#);  
[Alon 2007](#)). Further work could consider motifs that are overrep-  
resented in population networks, to assess whether population  
networks have a shared “motif signature” or if certain networks  
are more common in certain habitats (e.g. marine, river, terres-  
trial). Such an approach could help identify similarities between  
population networks and other types of biological networks.  
Our results can potentially be extended to larger networks, and  
it could be assessed how global patterns in genetic diversity and  
 $F_{ST}$  can be predicted from information on the occurrence of small  
motifs. Such an extension will become increasingly valuable as  
more empirical studies sample genomic datasets from broad  
geographical scales with fine-grained sampling resolution.

## 694 Acknowledgments

695 We thank G. Greenbaum for comments. Part of this work was  
696 completed when UR was a visitor at the Stanford Center for  
697 Computational, Evolutionary, and Human Genomics (CEHG).  
698 We acknowledge support from NSF grant DBI-1458059, a CEHG  
699 postdoctoral fellowship, and Swiss National Science Foundation  
700 Early Postdoc.Mobility fellowship P2LAP3\_161869.

## 701 Literature Cited

702 Alcalá, N., D. Streit, J. Goudet, and S. Vuilleumier, 2013 Peak  
703 and persistent excess of genetic diversity following an abrupt  
704 migration increase. *Genetics* **193**: 953–971.  
705 Alcalá, N. and S. Vuilleumier, 2014 Turnover and accumulation  
706 of genetic diversity across large time-scale cycles of isolation  
707 and connection of populations. *Proceedings of the Royal Society of London B: Biological Sciences* **281**: 20141369.  
708 Alon, U., 2007 Network motifs: theory and experimental approaches. *Nature Reviews Genetics* **8**: 450–461.  
709 Asmussen, S., 2008 *Applied probability and queues*. Springer-Verlag  
710 New York.  
711 Ball, M. C., L. Finnegan, M. Manseau, and P. Wilson, 2010 Integrating multiple analytical approaches to spatially delineate and characterize genetic population structure: an application to boreal caribou (*Rangifer tarandus caribou*) in central Canada. *Conservation Genetics* **11**: 2131–2143.  
712  
713 Cox, J. T. and R. Durrett, 2002 The stepping stone model: new formulas expose old myths. *Annals of Applied Probability* **12**: 1348–1377.  
714  
715 Dias, P. C., 1996 Sources and sinks in population biology. *Trends in Ecology & Evolution* **11**: 326–330.  
716  
717 Donnelly, P. and S. Tavaré, 1995 Coalescents and genealogical structure under neutrality. *Annual Review of Genetics* **29**: 401–421.  
718  
719 Dyer, R. J., 2015 Population graphs and landscape genetics. *Annual Review of Ecology, Evolution, and Systematics* **46**: 327–342.  
720  
721 Dyer, R. J. and J. D. Nason, 2004 Population graphs: the graph theoretic shape of genetic structure. *Molecular Ecology* **13**: 1713–1727.  
722  
723 Fu, Y.-X. and W.-H. Li, 1999 Coalescing into the 21st century: an overview and prospects of coalescent theory. *Theoretical*

*Population Biology* **56**: 1–10. 734  
735  
736 Garroway, C. J., J. Bowman, D. Carr, and P. J. Wilson, 2008 Applications of graph theory to landscape genetics. *Evolutionary Applications* **1**: 620–630. 737  
738  
739 Greenbaum, G., A. R. Templeton, and S. Bar-David, 2016 Inference and analysis of population structure using genetic data and network theory. *Genetics* **202**: 1299–1312. 740  
741  
742 Kelly, E. and B. L. Phillips, 2016 Targeted gene flow for conservation. *Conservation Biology* **30**: 259–267. 743  
744  
745 Kimura, M., 1953 "Stepping Stone" model of population. *Annual Report of the National Institute of Genetics Japan* **3**: 62–63. 746  
747  
748 Kimura, M., 1969 The number of heterozygous nucleotide sites maintained in a finite population due to steady flux of mutations. *Genetics* **61**: 893–903. 749  
750  
751 Kingman, J. F. C., 1982 On the genealogy of large populations. *Journal of Applied Probability* **19A**: 27–43. 752  
753  
754 Maruyama, T., 1970 Effective number of alleles in a subdivided population. *Theoretical Population Biology* **1**: 273–306. 755  
756  
757 Milo, R., S. Shen-Orr, S. Itzkovitz, N. Kashtan, D. Chklovskii, and U. Alon, 2002 Network motifs: simple building blocks of complex networks. *Science* **298**: 824–827. 758  
759  
760 Mondol, S., M. W. Bruford, and U. Ramakrishnan, 2013 Demographic loss, genetic structure and the conservation implications for Indian tigers. *Proceedings of the Royal Society of London B: Biological Sciences* **280**: 20130496. 761  
762  
763 Mondol, S., K. U. Karanth, and U. Ramakrishnan, 2009 Why the Indian subcontinent holds the key to global tiger recovery. *PLoS Genetics* **5**: e1000585. 764  
765  
766 Morrissey, M. B. and D. T. de Kerckhove, 2009 The maintenance of genetic variation due to asymmetric gene flow in dendritic metapopulations. *American Naturalist* **174**: 875–889. 767  
768  
769 Munwes, I., E. Geffen, U. Roll, A. Friedmann, A. Daya, Y. Tikochinski, and S. Gafny, 2010 The change in genetic diversity down the core-edge gradient in the eastern spadefoot toad (*Pelobates syriacus*). *Molecular Ecology* **19**: 2675–2689. 770  
771  
772 Natesh, M., G. Atla, P. Nigam, Y. V. Jhala, A. Zachariah, U. Borthakur, U. Ramakrishnan, Y. V. Jhala, and A. Zachariah, in press Conservation priorities for endangered Indian tigers through a genomic lens. *Nature Sci Rep* **xx**: xx–xx. 773  
774  
775 Nath, H. B. and R. C. Griffiths, 1993 The coalescent in two colonies with symmetric migration. *Journal of Mathematical Biology* **31**: 841–852. 776

- 776 Nei, M. and N. Takahata, 1993 Effective population size, genetic  
777 diversity, and coalescence time in subdivided populations.  
778 *Journal of Molecular Evolution* **37**: 240–244. 818
- 779 Notohara, M., 1990 The coalescent and the genealogical process  
780 in geographically structured population. *Journal of Mathe-*  
781 *matical Biology* **29**: 59–75. 819
- 782 Read, R. C. and R. J. Wilson, 2005 *An Atlas of Graphs (Mathematics)*.  
783 Oxford University Press. 820
- 784 Ripple, W. J., J. A. Estes, R. L. Beschta, C. C. Wilmers, E. G.  
785 Ritchie, M. Hebblewhite, J. Berger, B. Elmhagen, M. Letnic,  
786 M. P. Nelson, *et al.*, 2014 Status and ecological effects of the  
787 world’s largest carnivores. *Science* **343**: 1241484.
- 788 Robin, V. V., P. Gupta, P. Thatte, and U. Ramakrishnan, 2015  
789 Islands within islands: two montane palaeo-endemic birds  
790 impacted by recent anthropogenic fragmentation. *Molecular*  
791 *Ecology* **24**: 3572–3584.
- 792 Rosenberg, N. A. and M. Nordborg, 2002 Genealogical trees,  
793 coalescent theory and the analysis of genetic polymorphisms.  
794 *Nature Reviews Genetics* **3**: 380–390.
- 795 Rozenfeld, A. F., S. Arnaud-Haond, E. Hernández-García, V. M.  
796 Eguíluz, E. A. Serrão, and C. M. Duarte, 2008 Network anal-  
797 ysis identifies weak and strong links in a metapopulation  
798 system. *Proceedings of the National Academy of Sciences*  
799 *U.S.A.* **105**: 18824–18829.
- 800 Slatkin, M., 1987 The average number of sites separating DNA  
801 sequences drawn from a subdivided population. *Theoretical*  
802 *Population Biology* **32**: 42–49.
- 803 Slatkin, M., 1991 Inbreeding coefficients and coalescence times.  
804 *Genetical Research* **58**: 167–175.
- 805 Strobeck, C., 1987 Average number of nucleotide differences in  
806 a sample from a single subpopulation: a test for population  
807 subdivision. *Genetics* **117**: 149–153.
- 808 Vuilleumier, S. and H. P. Possingham, 2006 Does colonization  
809 asymmetry matter in metapopulations? *Proceedings of the*  
810 *Royal Society of London B: Biological Sciences* **273**: 1637–1642.
- 811 Wakeley, J., 1998 Segregating sites in Wright’s island model.  
812 *Theoretical Population Biology* **53**: 166–174.
- 813 Wilkinson-Herbots, H. M., 1998 Genealogy and subpopulation  
814 differentiation under various models of population structure.  
815 *Journal of Mathematical Biology* **37**: 535–585.
- 816 Wilkinson-Herbots, H. M., 2003 Coalescence times and  $F_{ST}$  val-  
817 ues in subdivided populations with symmetric structure. *Ad-*  
*vances in Applied Probability* **35**: 665–690.
- Wright, S., 1951 The genetical structure of populations. *Annals*  
*of Eugenics* **15**: 323–354.

## 821 Appendix A. Deriving expected coalescence times

822 Expected coalescence times can be obtained by first-step analysis.  
 823 The expected coalescence time of all states ( $ij$ ) (eq. 4), where  $i$   
 824 ranges in  $[1, 2, \dots, K - 1]$  and  $j$  ranges in  $[i, i + 1, \dots, K]$ , can be  
 825 decomposed into a sum of expected coalescence times (Notohara  
 826 1990; Wakeley 1998)

$$\bar{t}_{ij} = E[t_{ij}] + \sum_{k=1}^K \sum_{\substack{\ell=k \\ \{k,\ell\} \neq \{i,j\}}}^K p_{ij,k\ell}^* \bar{t}_{k\ell}, \quad (\text{A.1})$$

where  $E[t_{ij}]$  is the expected time before a change of state, and

$$p_{ij,k\ell}^* = \frac{q_{ij,k\ell}}{\sum_{\beta=1}^K \sum_{\substack{\gamma=\beta \\ \{\beta,\gamma\} \neq \{i,j\}}}^K q_{ij,\beta\gamma}},$$

827 where  $q$  terms are taken from eq. 1. Eq. A.1 describes a system of  
 828  $\binom{K}{2} + K$  equations. In the next sections, we describe this system  
 829 of equations in the cases of  $K = 1$  to  $K = 4$ .

### 830 1-vertex motif

831 The case of one subpopulation has a single possible initial state,  
 832 which is given by classical coalescent results (Kingman 1982):

$$\bar{t}_{11} = 1. \quad (\text{A.2})$$

833 This quantity directly gives the expected pairwise coalescence  
 834 time of motif 1.

### 835 2-vertex motifs

836 In the case of two subpopulations,  $M_{12} = M_{21} = M_1 = M_2 =$   
 837  $M$ . Eq. A.1 then simplifies to

$$\begin{aligned} \bar{t}_{11} &= \frac{1}{M+1} + \frac{\bar{t}_{12}M}{M+1}, \\ \bar{t}_{22} &= \frac{1}{M+1} + \frac{\bar{t}_{12}M}{M+1}, \\ \bar{t}_{12} &= \frac{1}{M} + \frac{\bar{t}_{11}M}{2M} + \frac{\bar{t}_{22}M}{2M}. \end{aligned} \quad (\text{A.3})$$

838 This system and its solution were derived in Nath and Griffiths  
 839 (1993). Setting  $M = 0$  and solving the system for  $\bar{t}_{11}$ ,  $\bar{t}_{22}$ , and  $\bar{t}_{12}$   
 840 gives the expected pairwise coalescence times of motif 2 (Table 1).  
 841 Considering  $M > 0$  and solving the system gives the expected  
 842 pairwise coalescence times of motif 3 (Table 1).

## 3-vertex motifs

In the case of three subpopulations (Fig. A1), eq. A.1 becomes

$$\begin{aligned} \bar{t}_{11} &= \frac{1}{M_1+1} + \frac{\bar{t}_{12}M_{12}}{M_1+1} + \frac{\bar{t}_{13}M_{13}}{M_1+1}, \\ \bar{t}_{22} &= \frac{1}{M_2+1} + \frac{\bar{t}_{12}M_{21}}{M_2+1} + \frac{\bar{t}_{23}M_{23}}{M_2+1}, \\ \bar{t}_{33} &= \frac{1}{M_3+1} + \frac{\bar{t}_{13}M_{31}}{M_3+1} + \frac{\bar{t}_{23}M_{32}}{M_3+1}, \\ \bar{t}_{12} &= \frac{1}{\frac{M_1}{2} + \frac{M_2}{2}} + \frac{\bar{t}_{11}M_{21}}{M_1+M_2} + \frac{\bar{t}_{13}M_{23}}{M_1+M_2} + \frac{\bar{t}_{22}M_{12}}{M_1+M_2} + \frac{\bar{t}_{23}M_{13}}{M_1+M_2}, \\ \bar{t}_{13} &= \frac{1}{\frac{M_1}{2} + \frac{M_3}{2}} + \frac{\bar{t}_{11}M_{31}}{M_1+M_3} + \frac{\bar{t}_{12}M_{32}}{M_1+M_3} + \frac{\bar{t}_{23}M_{12}}{M_1+M_3} + \frac{\bar{t}_{33}M_{13}}{M_1+M_3}, \\ \bar{t}_{23} &= \frac{1}{\frac{M_2}{2} + \frac{M_3}{2}} + \frac{\bar{t}_{12}M_{31}}{M_2+M_3} + \frac{\bar{t}_{22}M_{32}}{M_2+M_3} + \frac{\bar{t}_{13}M_{21}}{M_2+M_3} + \frac{\bar{t}_{33}M_{23}}{M_2+M_3}. \end{aligned} \quad (\text{A.4})$$

We set the values  $M_{ij}$  to reflect the network motifs of Figure 1,  
 solve the linear system of equation, and report the corresponding  
 expected times in Table 2. For example, for motif 5,  $M_1 = 0$ ,  
 $M_{12} = M_{21} = M_{13} = M_{31} = 0$  and  $M_{23} = M_{32} = M_2 = M_3 =$   
 $M$  in all equations, and we obtain the system of equations

$$\begin{aligned} \bar{t}_{11} &= 1, \\ \bar{t}_{22} &= \frac{1}{M+1} + \frac{\bar{t}_{23}M}{M+1}, \\ \bar{t}_{33} &= \frac{1}{M+1} + \frac{\bar{t}_{23}M}{M+1}, \\ \bar{t}_{12} &= \frac{1}{M/2} + \bar{t}_{13}, \\ \bar{t}_{13} &= \frac{1}{M/2} + \bar{t}_{12}, \\ \bar{t}_{23} &= \frac{1}{M} + \frac{\bar{t}_{22}}{2} + \frac{\bar{t}_{33}}{2}. \end{aligned} \quad (\text{A.5})$$

Note that this system is equivalent to considering that the iso-  
 lated subpopulation 1 follows eq. A.2, that subpopulations 2 and  
 3 follow eq. A.3 with labels 2 and 3 in place of 1 and 2, and that  
 coalescence times between subpopulations without migration (1  
 and 2 or 1 and 3) are infinite.

We can solve this system using substitution, by first noting  
 that  $\bar{t}_{22} = \bar{t}_{33}$ , and by then substituting the expression for  $\bar{t}_{22}$   
 into the equation of  $\bar{t}_{23}$ . We obtain  $(\bar{t}_{11}, \bar{t}_{22}, \bar{t}_{33}, \bar{t}_{12}, \bar{t}_{13}, \bar{t}_{23}) =$   
 $(1, 2, 2, \infty, \infty, 2 + 1/M)$  as reported in Table 2.

859 **4-vertex motifs**

860 For four subpopulations, eq. A.1 simplifies to

$$\begin{aligned}
 \bar{t}_{11} &= \frac{1}{M_1 + 1} + \frac{\bar{t}_{14}M_{14}}{M_1 + 1} + \frac{\bar{t}_{13}M_{13}}{M_1 + 1} + \frac{\bar{t}_{12}M_{12}}{M_1 + 1}, \\
 \bar{t}_{22} &= \frac{1}{M_2 + 1} + \frac{\bar{t}_{24}M_{24}}{M_2 + 1} + \frac{\bar{t}_{23}M_{23}}{M_2 + 1} + \frac{\bar{t}_{12}M_{21}}{M_2 + 1}, \\
 \bar{t}_{33} &= \frac{1}{M_3 + 1} + \frac{\bar{t}_{34}M_{34}}{M_3 + 1} + \frac{\bar{t}_{23}M_{32}}{M_3 + 1} + \frac{\bar{t}_{13}M_{31}}{M_3 + 1}, \\
 \bar{t}_{44} &= \frac{1}{M_4 + 1} + \frac{\bar{t}_{34}M_{43}}{M_4 + 1} + \frac{\bar{t}_{24}M_{42}}{M_4 + 1} + \frac{\bar{t}_{14}M_{41}}{M_4 + 1}, \\
 \bar{t}_{12} &= \frac{1}{\frac{M_1}{2} + \frac{M_2}{2}} + \frac{\bar{t}_{14}M_{24}}{M_1 + M_2} + \frac{\bar{t}_{13}M_{23}}{M_1 + M_2} + \frac{\bar{t}_{11}M_{21}}{M_1 + M_2} + \frac{\bar{t}_{24}M_{14}}{M_1 + M_2} \\
 &\quad + \frac{\bar{t}_{23}M_{13}}{M_1 + M_2} + \frac{\bar{t}_{22}M_{12}}{M_1 + M_2}, \\
 \bar{t}_{13} &= \frac{1}{\frac{M_1}{2} + \frac{M_3}{2}} + \frac{\bar{t}_{14}M_{34}}{M_1 + M_3} + \frac{\bar{t}_{12}M_{32}}{M_1 + M_3} + \frac{\bar{t}_{11}M_{31}}{M_1 + M_3} + \frac{\bar{t}_{34}M_{14}}{M_1 + M_3} \\
 &\quad + \frac{\bar{t}_{33}M_{13}}{M_1 + M_3} + \frac{\bar{t}_{23}M_{12}}{M_1 + M_3}, \\
 \bar{t}_{14} &= \frac{1}{\frac{M_1}{2} + \frac{M_4}{2}} + \frac{\bar{t}_{13}M_{43}}{M_1 + M_4} + \frac{\bar{t}_{12}M_{42}}{M_1 + M_4} + \frac{\bar{t}_{11}M_{41}}{M_1 + M_4} + \frac{\bar{t}_{44}M_{14}}{M_1 + M_4} \\
 &\quad + \frac{\bar{t}_{34}M_{13}}{M_1 + M_4} + \frac{\bar{t}_{24}M_{12}}{M_1 + M_4}, \\
 \bar{t}_{23} &= \frac{1}{\frac{M_2}{2} + \frac{M_3}{2}} + \frac{\bar{t}_{24}M_{34}}{M_2 + M_3} + \frac{\bar{t}_{22}M_{32}}{M_2 + M_3} + \frac{\bar{t}_{12}M_{31}}{M_2 + M_3} + \frac{\bar{t}_{34}M_{24}}{M_2 + M_3} \\
 &\quad + \frac{\bar{t}_{33}M_{23}}{M_2 + M_3} + \frac{\bar{t}_{13}M_{21}}{M_2 + M_3}, \\
 \bar{t}_{24} &= \frac{1}{\frac{M_2}{2} + \frac{M_4}{2}} + \frac{\bar{t}_{23}M_{43}}{M_2 + M_4} + \frac{\bar{t}_{22}M_{42}}{M_2 + M_4} + \frac{\bar{t}_{12}M_{41}}{M_2 + M_4} + \frac{\bar{t}_{44}M_{24}}{M_2 + M_4} \\
 &\quad + \frac{\bar{t}_{34}M_{23}}{M_2 + M_4} + \frac{\bar{t}_{14}M_{21}}{M_2 + M_4}, \\
 \bar{t}_{34} &= \frac{1}{\frac{M_3}{2} + \frac{M_4}{2}} + \frac{\bar{t}_{33}M_{43}}{M_3 + M_4} + \frac{\bar{t}_{23}M_{42}}{M_3 + M_4} + \frac{\bar{t}_{13}M_{41}}{M_3 + M_4} + \frac{\bar{t}_{44}M_{34}}{M_3 + M_4} \\
 &\quad + \frac{\bar{t}_{24}M_{32}}{M_3 + M_4} + \frac{\bar{t}_{14}M_{31}}{M_3 + M_4}.
 \end{aligned}
 \tag{A.6}$$

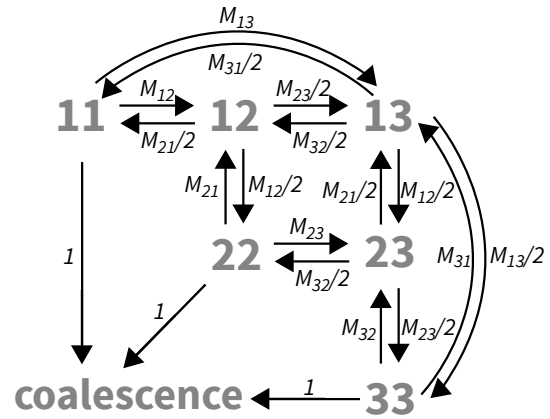

**Figure A1** State diagram of the Markov chain representing the coalescent process of two lineages sampled in  $K = 3$  subpopulations. States appear in gray and correspond to those presented in Figure 2; transition rates between states appear in black.  $M_{ij}$  corresponds to the scaled migration rate between subpopulations  $i$  and  $j$ . This diagram applies to all motifs with  $K = 3$  subpopulations—motifs 4 to 6 in Figure 1. For example, motif 4 corresponds to the case where  $M_{12} = M_{21} = M_{13} = M_{31} = M_{23} = M_{32} = 0$ , and motif 5 corresponds to the case where  $M_{12} = M_{21} = M$  and  $M_{13} = M_{31} = M_{23} = M_{32} = 0$ .

861 Similarly to the case of 3-vertex motifs, we set the values  $M_{ij}$   
 862 to reflect the network motifs of Figure 1, solve the system of  
 863 equations using substitution or matrix inversion, and report the  
 864 corresponding expected coalescence times in Table 3.
